# Supplementary material
Source: publisher figshare collection journal article supplement (https://acs.figshare.com/ndownloader/files/4922164)
Supplement: Supplementary file 1 [file 4922164]

## **Supporting Information**

### **SYNTHESIS OF A 3-THIOMANNOSIDE**

*María B. Comba, Alejandra G. Suárez, Ariel M. Sarotti, María I. Mangione\* and Rolando A. Spanevello\* and Enrique D. V. Giordano*

Instituto de Química Rosario, Facultad de Ciencias Bioquímicas y Farmacéuticas, Universidad Nacional de Rosario – CONICET. Suipacha 531, S2002RLK Rosario, Argentina.

#### **Corresponding authors:**

[\\*spanevello@iquir-conicet.gov.ar](mailto:*spanevello@iquir-conicet.gov.ar) and [mangione@iquir-conicet.gov.ar](mailto:mangione@iquir-conicet.gov.ar)

#### **Table of contents**

|                                                                      |           |
|----------------------------------------------------------------------|-----------|
| <b>Experimental Section</b> .....                                    | <b>S2</b> |
| Synthesis of Allylic alcohol <b>4</b> .....                          | S2        |
| Synthesis of Allylic xanthate <b>5</b> .....                         | S3        |
| Synthesis of Diol <b>2</b> .....                                     | S3        |
| Synthesis of Thiocarbonate <b>6</b> .....                            | S3        |
| Synthesis of Disulfide <b>7</b> .....                                | S4        |
| Synthesis of Acetylated disulfide <b>8</b> .....                     | S4        |
| Synthesis of Triacetate <b>11</b> .....                              | S4        |
| Thiomannopyranoside <b>1</b> .....                                   | S5        |
| <b>Selected spectra</b> .....                                        | <b>S6</b> |
| Figure S-1: <sup>1</sup> H-NMR (300 MHz) of compound <b>4</b> .....  | S6        |
| Figure S-2: <sup>13</sup> C-NMR (75 MHz) of compound <b>4</b> .....  | S6        |
| Figure S-3: <sup>1</sup> H-NMR (300 MHz) of compound <b>5</b> .....  | S7        |
| Figure S-4: <sup>13</sup> C-NMR (75 MHz) of compound <b>5</b> .....  | S7        |
| Figure S-5: <sup>1</sup> H-NMR (300 MHz) of compound <b>2</b> .....  | S8        |
| Figure S-6: <sup>13</sup> C-NMR (75 MHz) of compound <b>2</b> .....  | S8        |
| Figure S-7: <sup>1</sup> H-NMR (300 MHz) of compound <b>6</b> .....  | S9        |
| Figure S-8: <sup>13</sup> C-NMR (75 MHz) of compound <b>6</b> .....  | S9        |
| Figure S-9: <sup>1</sup> H-NMR (300 MHz) of compound <b>7</b> .....  | S10       |
| Figure S-10: <sup>13</sup> C-NMR (75 MHz) of compound <b>7</b> ..... | S10       |

|                                                                        |     |
|------------------------------------------------------------------------|-----|
| Figure S-11: $^1\text{H}$ -NMR (300 MHz) of compound <b>8</b> .....    | S11 |
| Figure S-12: $^{13}\text{C}$ -NMR (75 MHz) of compound <b>8</b> .....  | S11 |
| Figure S-13: $^1\text{H}$ -NMR (300 MHz) of compound <b>11</b> .....   | S12 |
| Figure S-14: $^{13}\text{C}$ -NMR (75 MHz) of compound <b>11</b> ..... | S12 |
| Figure S-15: $^1\text{H}$ -NMR (300 MHz) of compound <b>1</b> .....    | S13 |
| Figure S-16: $^{13}\text{C}$ -NMR (75 MHz) of compound <b>1</b> .....  | S13 |

## Experimental Section

All reagents and solvents were used directly as purchased or purified according to standard procedures. Analytical thin layer chromatography was carried out using commercial silica gel plates (Merck, Silica Gel 60 F254) and visualization was effected with short wavelength UV light (254 nm) and *p*-anisaldehyde solution with subsequent heating. Flash column chromatography was performed with silica gel 60 H (Merck) using EtOAc:hexanes mixtures. NMR spectra were recorded at 300 MHz for  $^1\text{H}$ , and 75 MHz for  $^{13}\text{C}$  on a Bruker Avance-300 DPX spectrometer with  $\text{CDCl}_3$  as solvent and  $(\text{CH}_3)_4\text{Si}$  ( $^1\text{H}$ ) as internal standard. Chemical shifts are reported in delta ( $\delta$ ) units in parts per million (ppm) and splitting patterns are designated as s, singlet; d, doublet; t, triplet; q, quartet; and m, multiplet. Coupling constants are recorded in Hertz (Hz). The structure of the products were determined by a combination of spectroscopic methods such as IR, 1D and 2D NMR (including NOE, COSY, HSQC and HMBC experiments) and HRMS. Infrared spectra were recorded on a Shimadzu IR Prestige-21 spectrometer using sodium chloride plate pellets. Absorbance frequencies are recorded in reciprocal centimeters ( $\text{cm}^{-1}$ ). High resolution mass spectra (HRMS) were obtained on a Bruker microTOF-Q II LC-MS spectrometer. Optical rotations were determined using a JASCO DIP-1000 digital polarimeter in 100 mm cells and the sodium D line (589 nm) at room temperature in the solvent and concentration indicated. The melting points were taken on a Leitz Wetzlar Microscope Heating Stage Model 350 apparatus and are uncorrected. Levoglucosenone **3** was obtained according to the procedure previously described.<sup>16</sup>

### Synthesis of Allylic alcohol **4**

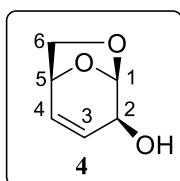

Compound **3** (5.94 g, 47.13 mmol) was dissolved in MeOH (32 mL) and cooled at 0 °C.  $\text{CeCl}_3 \cdot 7\text{H}_2\text{O}$  (17.56 g, 47.13 mmol) and  $\text{NaBH}_4$  (1.42 g, 37.7 mmol) were added and stirred for 2.5 h. The solution was neutralized with HCl 0.1 N to reach pH = 7. The mixture was diluted with water (5 mL) and extracted several times with 50 mL portions of EtOAc. The combined organic extracts were dried ( $\text{Na}_2\text{SO}_4$ ) and concentrated. The residue was purified by flash chromatography to afford **4** (5.59 g, 43.60 mmol, 92%) as a white crystalline solid;  $R_f$  (60% hexane- EtOAc) 0.17; mp = 67–68 °C (ethyl ether) [Lit 67–69 °C]<sup>29</sup>;  $[\alpha]_D^{25}$  -32.2 (*c* 0.995,  $\text{CHCl}_3$ ) [Lit -34 (*c* 1.00,  $\text{CHCl}_3$ )]<sup>29</sup>;  $\nu_{\text{max}}$  (KBr) 3445 (OH), 3420, 1628 (C=C), 1122, 1066, 1045  $\text{cm}^{-1}$ ;  $\delta_{\text{H}}$  (300 MHz  $\text{CDCl}_3$ ) 6.12 (1H, dd, *J* 9.8, 4.3 Hz, H-4), 5.70 (1H, ddd, *J* 9.8, 2.4, 2.2 Hz, H-3), 5.51 (1H, dd, *J* 2.7, 2.2 Hz, H-1), 4.66 (1H, dd, *J* 4.3, 4.2 Hz, H-5), 4.33 (1H, s, H-2), 3.84 (1H, d, *J* 6.6 Hz, H-6*endo*), 3.75 (1H, dd, *J* 6.6, 4.2 Hz, H-6*exo*), 2.15 (1H, s, OH);  $\delta_{\text{C}}$  (75 MHz  $\text{CDCl}_3$ ) 130.6 (C-4), 129.0 (C-3), 101.1 (C-1), 71.1 (C-2), 70.5 (C-6), 68.6 (C-5).

### Synthesis of Allylic xanthate **5**

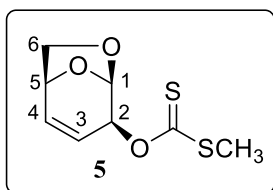

To a solution of compound **4** (1.26 g, 9.84 mmol) in 10 mL of anhydrous THF was added a suspension of NaH (60% dispersion in mineral oil) (0.86 g, 19.70 mmol) in 40 mL of anhydrous THF. The mixture was cooled at 0 °C. CS<sub>2</sub> (1.5 mL, 24.60 mmol) and CH<sub>3</sub>I (2.15 mL, 34.50 mmol) were added. The mixture was stirred during 3 h and then a solution of NH<sub>4</sub>Cl (sat) (2 mL) was added. The solution was extracted with EtOAc (100 mL) and then washed with 5 mL of brine.

The combined organic extracts were dried (Na<sub>2</sub>SO<sub>4</sub>) and concentrated. The residue was purified by flash chromatography to afford **5** (2.01 g, 9.22 mmol, 94%) as a white crystalline solid; R<sub>f</sub> (60% hexane-EtOAc) 0.56; mp = 61-62 °C (diisopropylether). [α]<sub>D</sub><sup>22</sup> +18.2 (c 1.145, CHCl<sub>3</sub>); ν<sub>max</sub> (KBr) 3000, 2968, 2908, 1653 (C=C), 1288, 1208 (C=S), 1120, 882 cm<sup>-1</sup>; δ<sub>H</sub> (300 MHz CDCl<sub>3</sub>) 6.36 (1H, s, H-2), 6.27 (1H, dd, *J* 9.8, 4.1 Hz, H-4), 5.79 (1H, s, H-1), 5.76 (1H, d, *J* 9.8 Hz, H-3), 4.73 (1H, dd, *J* 4.3, 4.1 Hz, H-5), 4.02 (1H, d, *J* 6.4 Hz, H-6<sub>endo</sub>), 3.82 (1H, dd, *J* 6.4, 4.3 Hz, H-6<sub>exo</sub>), 2.59 (3H, s, SCH<sub>3</sub>); δ<sub>C</sub> (75 MHz CDCl<sub>3</sub>) 215.8 (C=S), 133.2 (C-4), 123.8 (C-3), 98.3 (C-1), 79.3 (C-2), 71.3 (C-5), 71.1 (C-6), 19.1 (SCH<sub>3</sub>); HRMS (EI, MH<sup>+</sup>) MH<sup>+</sup> found 219.01384, C<sub>8</sub>H<sub>11</sub>O<sub>3</sub>S<sub>2</sub><sup>+</sup> calcd 219.01441.

### Synthesis of Diol **2**

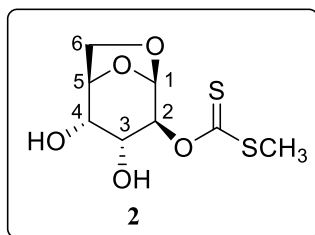

Compound **5** (795 mg, 3.64 mmol) was dissolved in acetone:H<sub>2</sub>O 95:5 mixture (25.7 mL), NMO was added and then a solution of OsO<sub>4</sub> in *t*-BuOH was added (9.20 mg, 0.04 mmol). The mixture was stirred during 72 h and then cooled at 0 °C. Na<sub>2</sub>SO<sub>3</sub> was added and after 10 min the solution was filtered. The residue was purified by flash chromatography to afford **2** (861 mg, 3.42 mmol, 94%) a white crystalline solid; R<sub>f</sub> (60% Hexane-EtOAc) 0.08; mp = 119-120 °C (diisopropylether); [α]<sub>D</sub><sup>21</sup> -155.6 (c 1.095, CHCl<sub>3</sub>); ν<sub>max</sub> (KBr) 3534

(OH), 3442 (OH), 2973, 2959, 2928, 2896, 1477, 1409, 1332, 1311, 1283, 1208 (C=S), 1088, 915 cm<sup>-1</sup>; δ<sub>H</sub> (300 MHz CDCl<sub>3</sub>) 5.63 (1H, dd, *J* 8.3, 1.7 Hz, H-2), 5.60 (1H, d, *J* 1.7 Hz, H-1), 4.72 (1H, ddd, *J* 5.1, 1.9, 1.6 Hz, H-5), 4.09 (1H, s, H-3), 4.00 (1H, s, H-4), 3.86 (1H, dd, *J* 8.1, 5.1 Hz, H-6<sub>exo</sub>), 3.81 (1H, dd, *J* 8.1, 1.6 Hz, H-6<sub>endo</sub>), 3.06 (1H, s, OH), 3.02 (1H, s, OH), 2.60 (3H, s, SCH<sub>3</sub>); δ<sub>C</sub> (75 MHz CDCl<sub>3</sub>) 217.0 (C=S), 98.3 (C-1), 83.2 (C-2), 76.2 (C-5), 70.5 (C-3), 67.9 (C-4), 65.5 (C-6), 19.3 (SCH<sub>3</sub>); HRMS (EI MNa<sup>+</sup>) found 275.00115, C<sub>8</sub>H<sub>12</sub>O<sub>5</sub>S<sub>2</sub>Na<sup>+</sup> calcd 275.00184.

### Synthesis of Thiocarbonate **6**

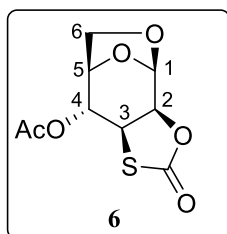

Xanthate **2** (190 mg, 0.75 mmol) was dissolved in AcOH (12 mL) and cooled at 0 °C in an ice-bath. A solution of H<sub>2</sub>SO<sub>4</sub>/AcOH 50 % (7.8 mL) was added and the mixture was stirred for 6 h at room temperature. The mixture was cooled to 0 °C in an ice bath and diluted with EtOAc (150 mL). Solid NaHCO<sub>3</sub> (10 g) was added and after 10 minutes of stirring, the base was dissolved with water and the phases were separated. The organic layer was washed with 5% aqueous NaHCO<sub>3</sub> (2 x 50 mL), brine (50 mL) and dried (Na<sub>2</sub>SO<sub>4</sub> anhyd.). After filtration, the solvents were concentrated under reduced

pressure. The residue was purified by flash chromatography to afford compound **6** (124.3 mg, 0.50 mmol, 67%) as white crystalline solid; R<sub>f</sub> (60%, hexane:EtOAc) 0.21; [α]<sub>D</sub><sup>23</sup> -112.4 (c 1.1, CHCl<sub>3</sub>); ν<sub>max</sub> (KBr) 2981, 2843, 1748 (C=O), 1357, 1223, 1206, 1160, 1023, 841 cm<sup>-1</sup>; δ<sub>H</sub> (300 MHz CDCl<sub>3</sub>) 5.56 (1H, d, *J* 2.3 Hz, H-1), 5.00 (1H, s, H-4), 4.69 (1H, dd, *J* 8.6, 2.3 Hz, H-2), 4.66 (1H, dd, *J* 5.8 Hz, H-5), 4.32 (1H, dd, *J* 8.6 Hz, H-3), 4.30 (1H, dd, *J* 8.4 Hz, H-6<sub>endo</sub>), 3.88 (1H, dd, *J* 8.4 Hz, 5.8 Hz, H-6<sub>exo</sub>), 2.15 (3H, s, COCH<sub>3</sub>); δ<sub>C</sub> (75 MHz, CDCl<sub>3</sub>) 170.3 (C=O), 169.8 (COCH<sub>3</sub>), 98.0 (C-1), 74.4 (C-5), 74.2 (C-2), 69.8 (C-4), 66.1 (C-6), 45.3 (C-3), 20.8 (COCH<sub>3</sub>); HRMS (EI, MNa<sup>+</sup>): MNa<sup>+</sup>, found 269.00921 C<sub>9</sub>H<sub>10</sub>O<sub>6</sub>SN<sup>+</sup> calcd 269.00903.

### Synthesis of Disulfide **7**

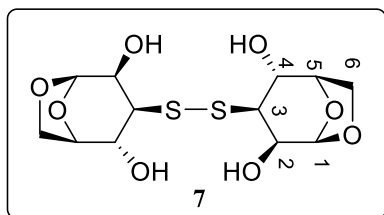

Compound **6** (88 mg, 0.36 mmol) was dissolved in anhydrous CH<sub>3</sub>OH (12 mL) and anhydrous K<sub>2</sub>CO<sub>3</sub> (86 mg, 0.62 mmol) was added. The mixture was stirred for 3 h at room temperature under argon atmosphere. After completion (according to TLC analysis) the reaction mixture was filtered over a Celite pad and washed with aliquots of CH<sub>3</sub>OH. The combined filtrates were concentrated under reduced pressure obtaining colorless oil. This compound was used without further purification in the next reaction step. For structural characterization an aliquot of crude product **7** was suspended in methyl *tert*-butyl ether and stirred overnight to obtain compound **7** as an off-white solid.;  $\nu_{\max}$  (KBr) 3342 (OH), 2926, 1635, 1558, 1386, 1078 cm<sup>-1</sup>;  $\delta_{\text{H}}$  (300 MHz, H<sub>2</sub>O) 5.32 (1H, s, H-1), 4.55 (1H, d, *J* 5.1 Hz, H-5), 4.43 (1H, d, *J* 8.1 Hz, H-6*endo*), 4.30 (1H, s, H-4), 4.11 (1H, d, *J* 6.7 Hz, H-2), 3.66 (1H, dd, *J* 5.1, 7.7 Hz, H-6*exo*), 3.36 (1H, d, *J* 6.7 Hz, H-3), 3.27 (1H, s, OH), 1.83 (1H, s, OH);  $\delta_{\text{C}}$  (75 MHz, H<sub>2</sub>O) 101.2 (C-1), 76.8 (C-5), 71.3 (C-4), 67.1 (C-2), 65.6 (C-6), 56.8 (C-3), HRMS (EI, MK<sup>+</sup>): MK<sup>+</sup>, found 393.00692. C<sub>12</sub>H<sub>18</sub>KO<sub>8</sub>S<sub>2</sub><sup>+</sup> calcd 393.00747.

### Synthesis of Acetylated disulfide **8**

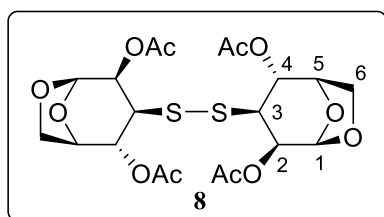

Crude product **7** (88 mg) was dissolved in anhydrous CH<sub>2</sub>Cl<sub>2</sub> (1.8 mL) and the distilled pyridine (0.8 mL) was added at room temperature. Ac<sub>2</sub>O (0.4 mL, 3.57 mmol) and DMAP (11 mg, 0.09 mmol) were added and the solution was stirred overnight under argon atmosphere. The mixture was treated with HCl 50% (1 mL) and extracted with EtOAc (3 x 30 mL). The combined organic layers were dried (Na<sub>2</sub>SO<sub>4</sub> anh.) and concentrated under reduced pressure. The resulting residue was purified by flash chromatography to afford compound **8** (71 mg, 0.20 mmol, 55% two steps) as a white crystalline solid.; **8**: R<sub>f</sub> (60% hexane/ EtOAc) 0.32;  $[\alpha]_{\text{D}}^{28}$  +134.8 (*c* 1.1, CH<sub>2</sub>Cl<sub>2</sub>); mp 199 – 200° C (CH<sub>2</sub>Cl<sub>2</sub>/hexane);  $\nu_{\max}$  (KBr) 1734 (C=O), 1375, 1361, 1247, 1236, 1153 cm<sup>-1</sup>;  $\delta_{\text{H}}$  (300 MHz, CDCl<sub>3</sub>) 5.41 (1H, bs, H-1), 5.24 (1H, s, H-4), 4.88 (1H, dd, *J* 1.3, 7.0 Hz, H-2), 4.63 (1H, d, *J* 5.1 Hz, H-5), 4.49 (1H, d, *J* 8.0 Hz, H-6*endo*), 3.77 (1H, dd, *J* 5.1, 8.0 Hz, H-6*exo*), 3.59 (1H, d, *J* 7.0, 8.0 Hz, H-3), 2.17 (3H, s, COCH<sub>3</sub>), 2.08 (3H, s, COCH<sub>3</sub>);  $\delta_{\text{C}}$  (75 MHz, CDCl<sub>3</sub>) 170.2 (COCH<sub>3</sub>), 170.1 (COCH<sub>3</sub>), 99.6 (C-1), 75.1 (C-5), 72.4 (C-4), 70.4 (C-2), 65.9 (C-6), 48.6 (C-3), 21.1 (COCH<sub>3</sub>), 20.5 (COCH<sub>3</sub>); HRMS (EI, MNa<sup>+</sup>): MNa<sup>+</sup>, found 545.07622. C<sub>20</sub>H<sub>26</sub>NaO<sub>12</sub>S<sub>2</sub><sup>+</sup> calcd 545.07579.

### Synthesis of Triacetate **11**

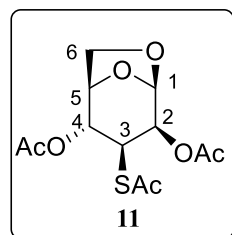

Compound **8** (25 mg, 0.05 mmol) was dissolved in anhydrous THF (6 mL) and cooled to 0° C. LiAlH<sub>4</sub> (18 mg, 0.50 mmol) was added and the resulting suspension was stirred at room temperature for 16 h. The mixture was cooled to 0° C, diluted with EtOAc (2.5 mL) and the excess of reducing agent was destroyed by addition of methanol (2.5 mL). Finally, the mixture was neutralized with AcOH and solvents were concentrated under reduced pressure. The resulting residue was dissolved in anhydrous pyridine (0.7 mL) and Ac<sub>2</sub>O (0.7 mL) and catalytic amount of DMAP was added. The mixture was stirred for 16 h at room temperature. The reaction was concentrated and the residue was dissolved in CH<sub>2</sub>Cl<sub>2</sub> (20 mL) and washed with water (2 x 10 mL). The organic layer was dried (Na<sub>2</sub>SO<sub>4</sub> anh.)

and the solvent was concentrated under reduced pressure. The residue was purified by flash chromatography to give compound **11** (17.6 mg, 0.06 mmol, 57% two steps) as a colorless oil;  $R_f$  (60% hexane/EtOAc) 0.39;  $[\alpha]_D^{26}$  -85.8 ( $c$  0.6,  $CDCl_3$ );  $\nu_{max}$  (liquid film) 1735 (C=O), 1691, 1373, 1217, 1062  $cm^{-1}$ ;  $\delta_H$  (300 MHz,  $CDCl_3$ ) 5.45 (1H, s, H-1), 5.15 (1H, dd,  $J$  1.6, 7.1 Hz, H-2), 4.86 (1H, bs, H-4), 4.57 (1H, d,  $J$  5.4 Hz, H-5), 4.29 (1H, d,  $J$  7.1 Hz, H-3), 4.27 (1H, d,  $J$  8.4 Hz, H-6 $_{endo}$ ), 3.78 (1H, dd,  $J$  5.4, 8.4 Hz, H-6 $_{exo}$ ), 2.35 (3H, s,  $COCH_3$ ), 2.17 (3H, s,  $COCH_3$ ), 2.10 (3H, s,  $COCH_3$ );  $\delta_C$  (75 MHz,  $CDCl_3$ ) 192.9 ( $\underline{COCH_3}$ ), 168.8 ( $\underline{COCH_3}$ ), 168.2 ( $\underline{COCH_3}$ ), 98.8 (C-1), 73.7 (C-5), 73.1 (C-4), 67.5 (C-2), 64.9 (C-6), 41.1 (C-3), 29.2 ( $\underline{COCH_3}$ ), 20.1 ( $\underline{COCH_3}$ ), 19.6 ( $\underline{COCH_3}$ ); HRMS (EI,  $MNa^+$ ):  $MNa^+$ , found 327.04975.  $C_{12}H_{16}NaO_7S^+$  calcd 327.05089.

### Synthesis of Thiomannopyranoside **1**

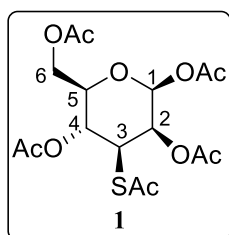

Compound **11** (55 mg, 0.18 mmol) was dissolved in  $Ac_2O$  (1.8 mL) under argon atmosphere. The solution was cooled at 0 °C and 2 drops of TMSOTf were added. The mixture was stirred for 1 h at room temperature. Then, the reaction mixture was treated with a saturated solution of  $NaHCO_3$  (1 mL) and extracted with EtOAc (3 x 10 mL). The combine organic layers were dried ( $Na_2SO_4$  anhyd.) and the solvent was concentrated under reduced pressure. The residue was purified by flash chromatography to give **1** (57.6 mg, 0.16 mmol, 88%) as a colorless oil;  $R_f$  (60% hexane/EtOAc) 0.6;

$[\alpha]_D^{22}$  +28.4 ( $c$  1.1,  $CDCl_3$ );  $\nu_{max}$  (liquid film) 1749 (C=O), 1371, 1217  $cm^{-1}$ ;  $\delta_H$  (300 MHz,  $CDCl_3$ ) 6.01 (1H, d,  $J$  1.7 Hz, H-1), 5.17 (1H, dd,  $J$  9.7, 11.4 Hz, H-4), 5.00 (1H, dd,  $J$  1.7, 3.0 Hz, H-2), 4.26 (1H, dd,  $J$  3.0, 11.4 Hz, H-3), 4.22 (1H, m, H-6), 4.08 (1H, m, H-5), 4.05 (1H, m, H-6), 2.31 (3H, s,  $COCH_3$ ), 2.17 (3H, s,  $COCH_3$ ), 2.13 (3H, s,  $COCH_3$ ), 2.05 (3H, s,  $COCH_3$ ), 2.01 (3H, s,  $COCH_3$ );  $\delta_C$  (75 MHz,  $CDCl_3$ ) 193.4 ( $\underline{COCH_3}$ ), 170.6 ( $\underline{COCH_3}$ ), 169.6 (2  $\underline{COCH_3}$ ), 168.2 ( $\underline{COCH_3}$ ), 89.6 (C-1), 71.3 (C-5), 70.8 (C-2), 65.6 (C-4), 62.3 (C-6), 43.7 (C-3), 30.5 ( $\underline{COCH_3}$ ), 20.9 ( $\underline{COCH_3}$ ), 20.7 ( $\underline{COCH_3}$ ), 20.6 ( $\underline{COCH_3}$ ), 20.5 ( $\underline{COCH_3}$ ); HRMS (EI,  $MNa^+$ ):  $MNa^+$ , found 429.08385.  $C_{16}H_{22}NaO_{10}S^+$  calcd 429.08259.

## Selected spectra

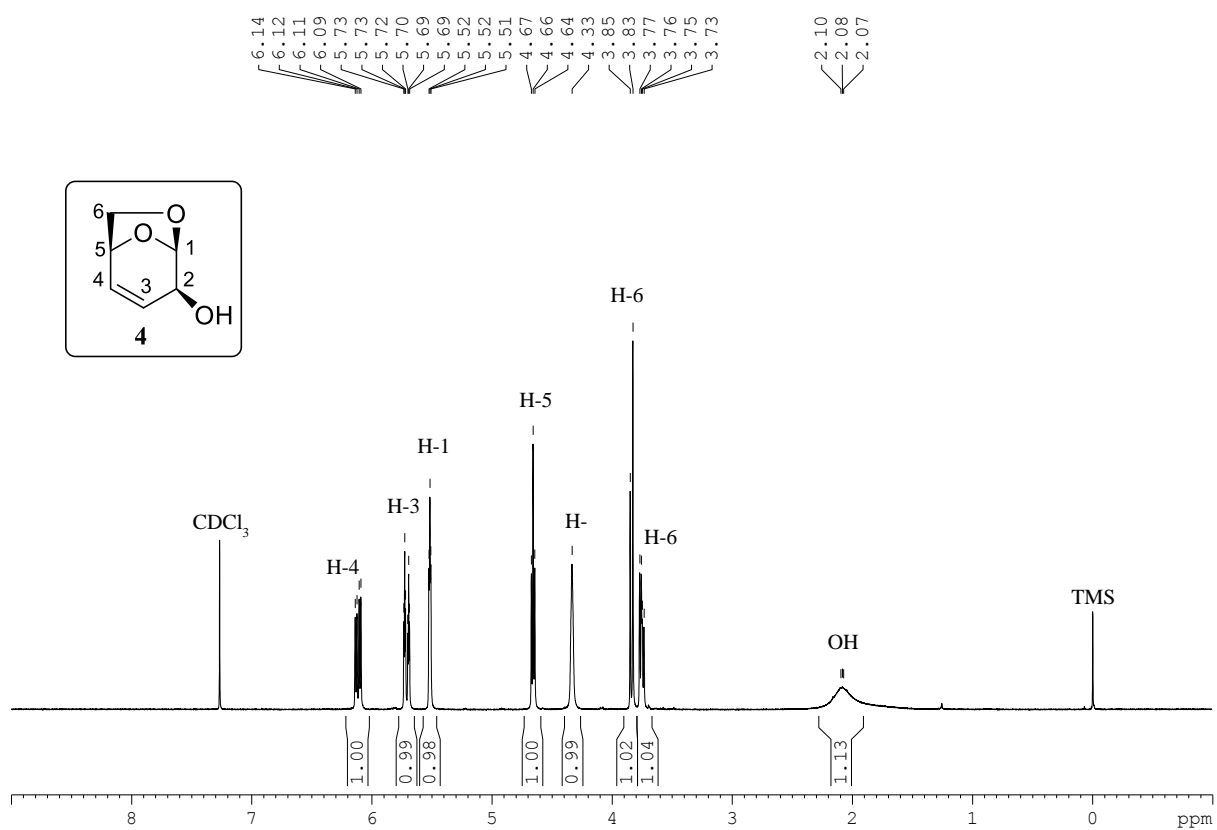

Figure S-1:  $^1\text{H}$  spectrum of **4** in  $\text{CDCl}_3$ .

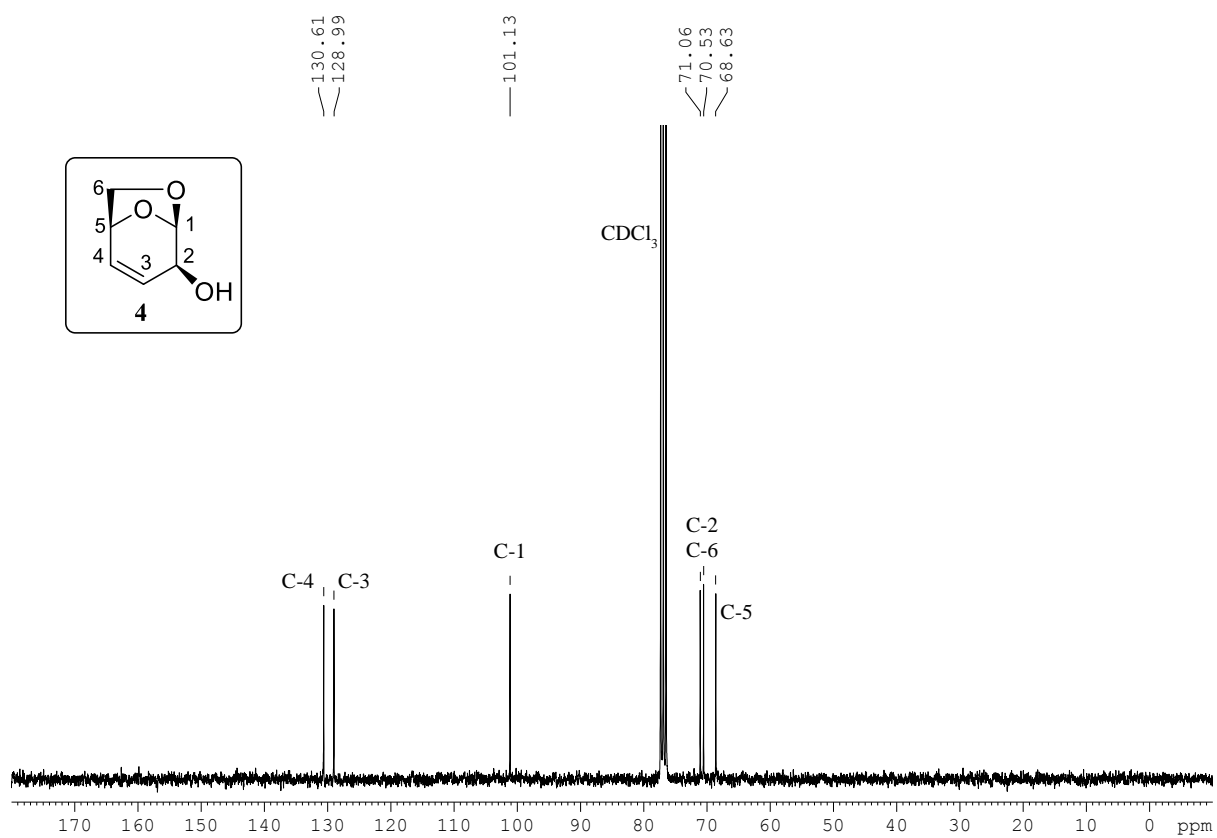

Figure S-2:  $^{13}\text{C}$  spectrum of **4** in  $\text{CDCl}_3$ .

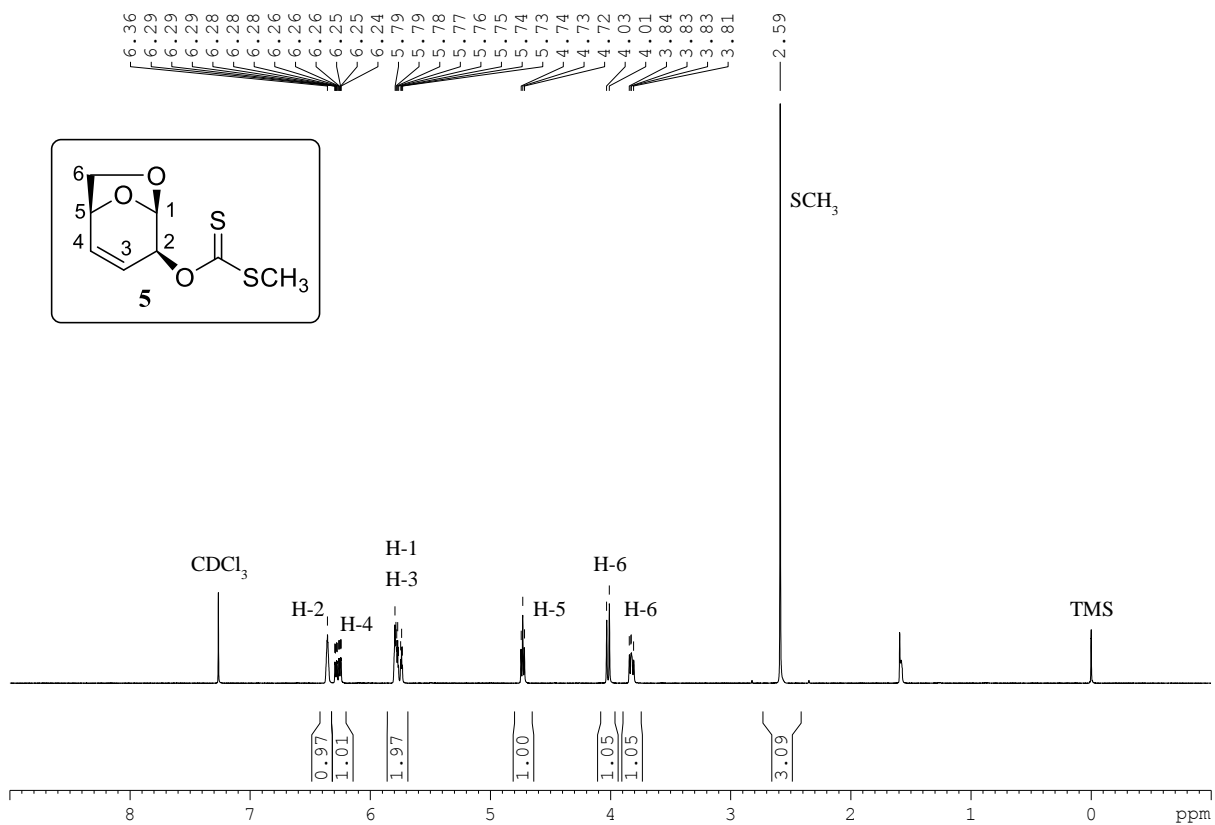

Figure S-3: <sup>1</sup>H spectrum of **5** in CDCl<sub>3</sub>.

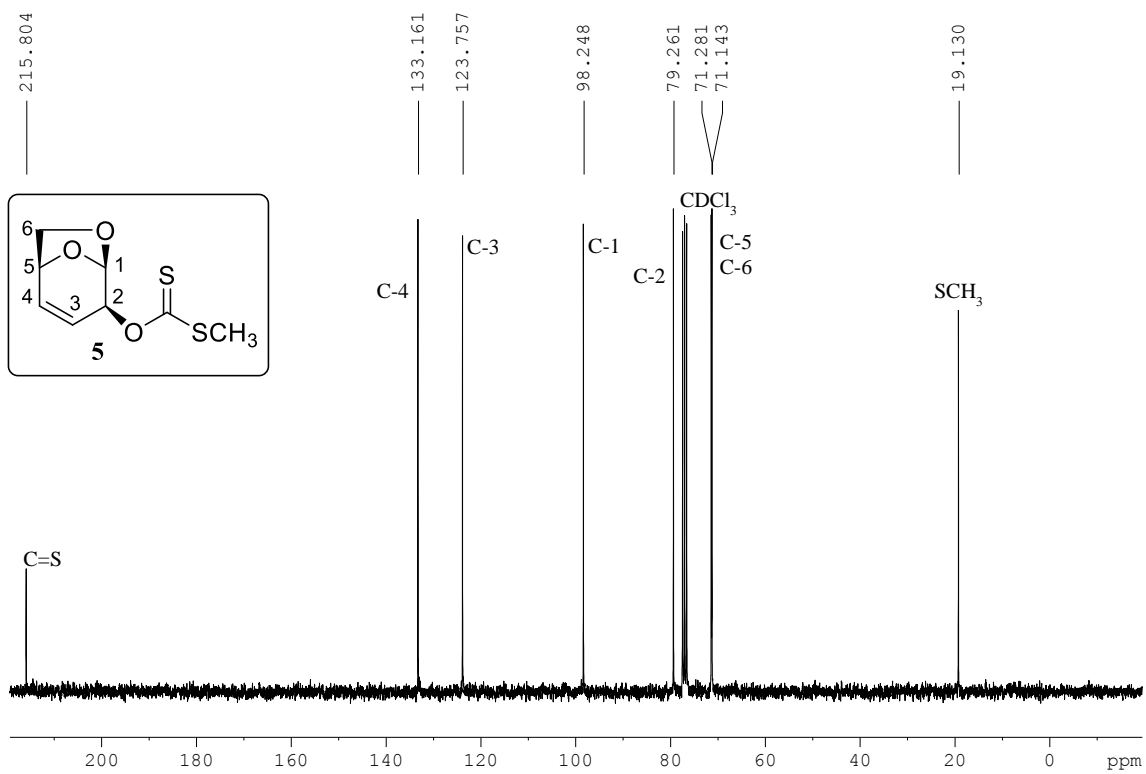

Figure S-4: <sup>13</sup>C spectrum of **5** in CDCl<sub>3</sub>.

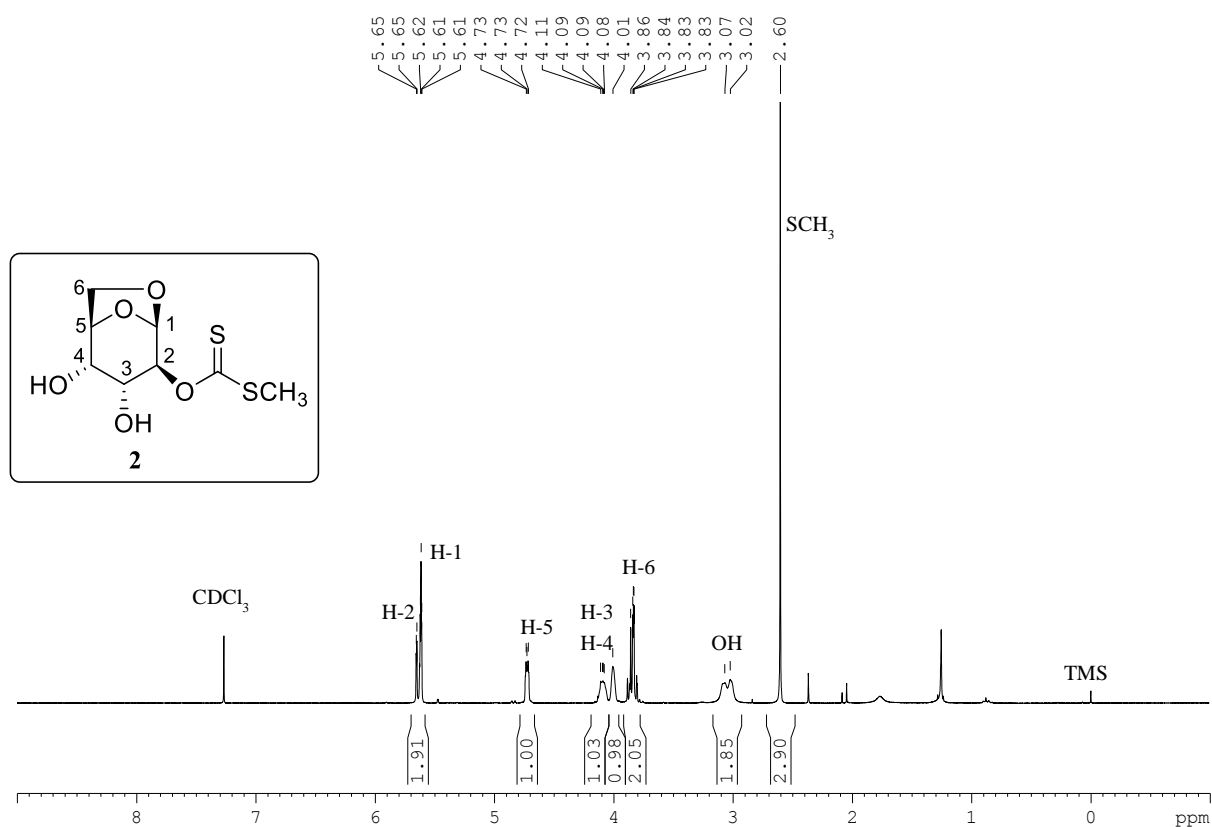

Figure S-5: <sup>1</sup>H spectrum of **2** in CDCl<sub>3</sub>.

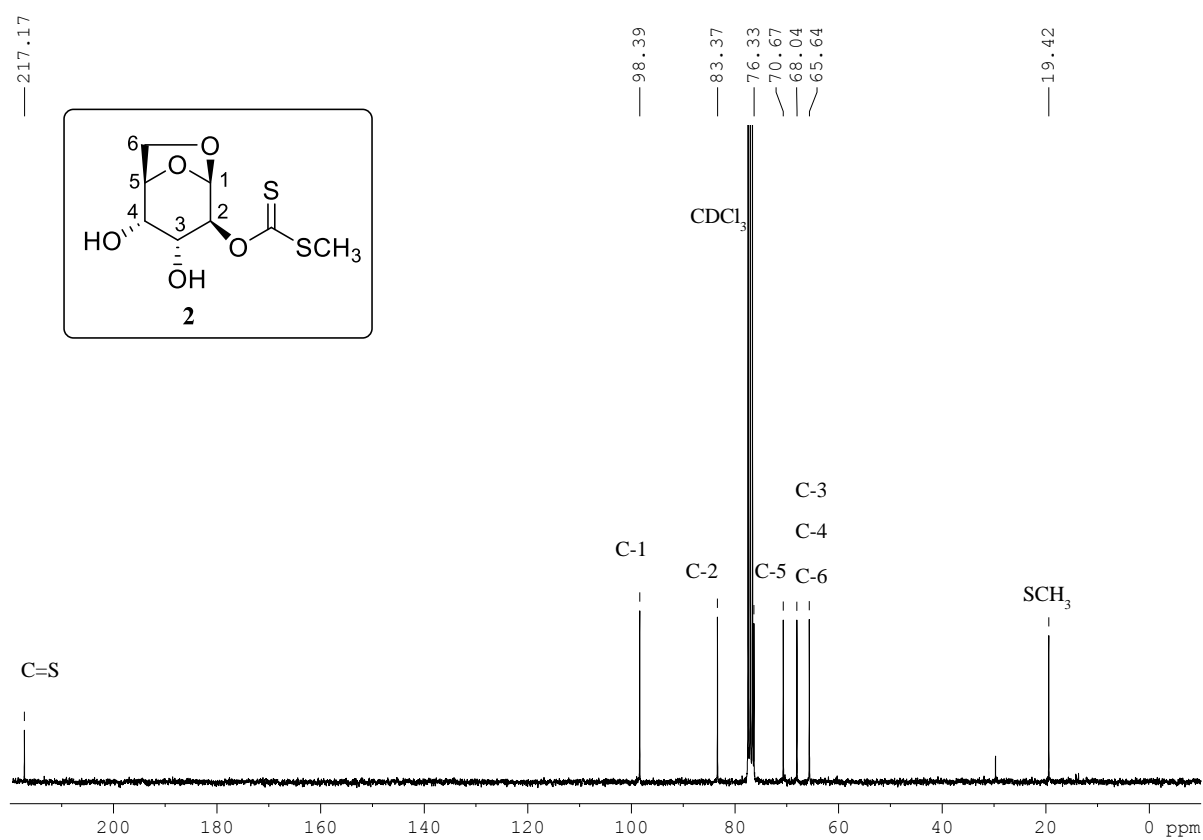

Figure S-6: <sup>13</sup>C spectrum of **2** in CDCl<sub>3</sub>.



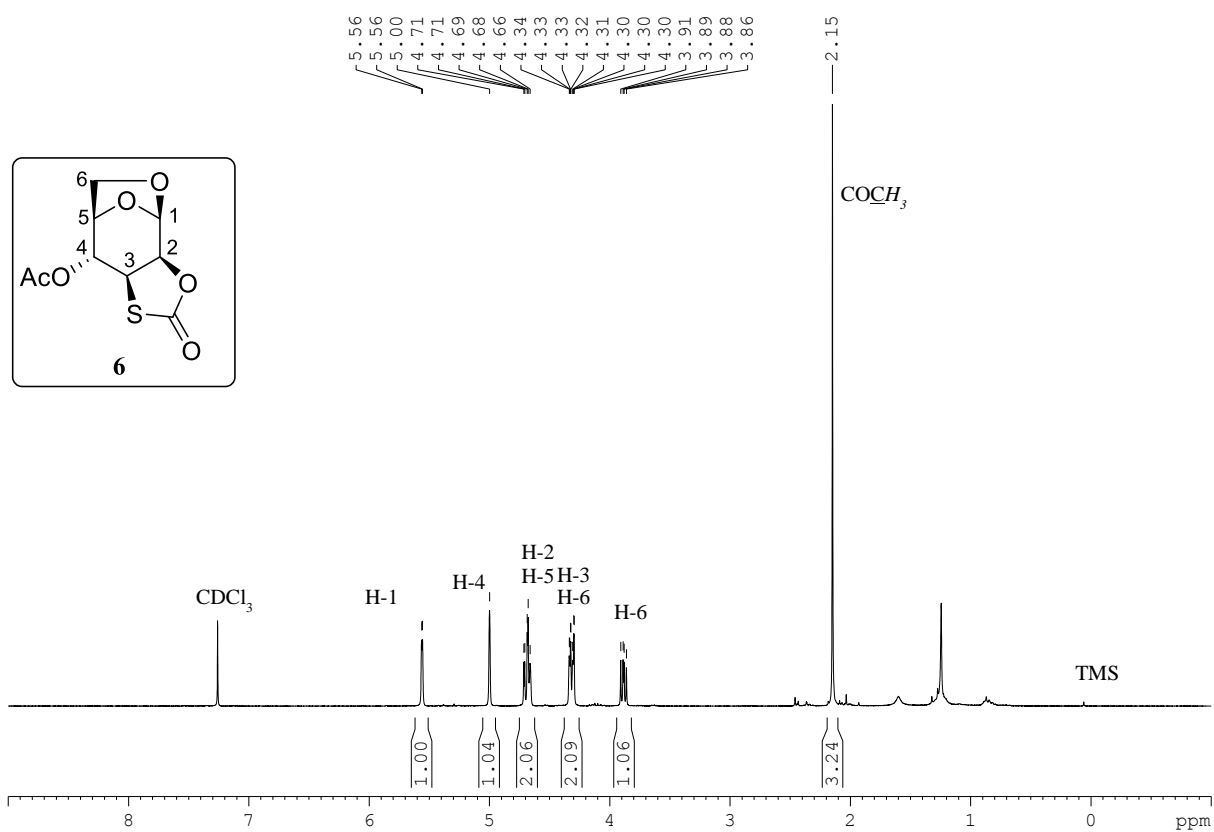

Figure S-7: <sup>1</sup>H spectrum of **6** in  $\text{CDCl}_3$ .

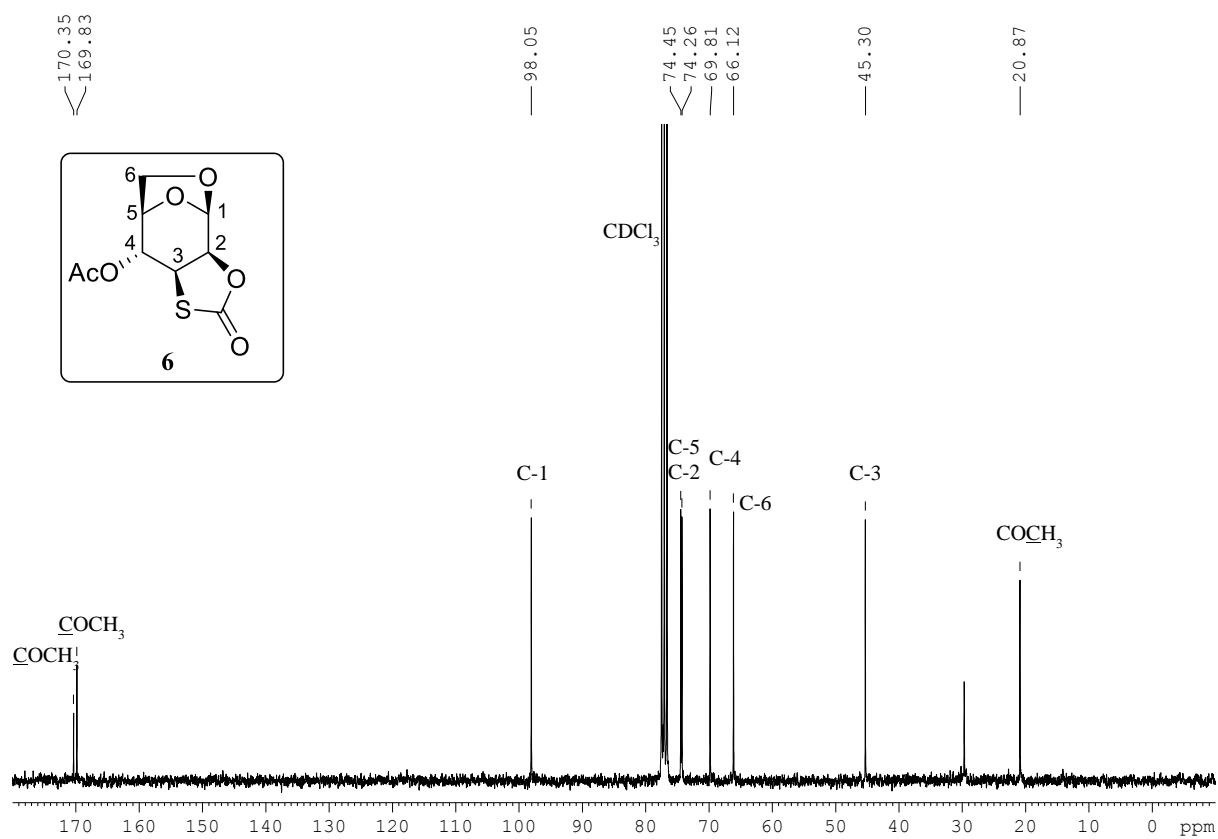

Figure S-8: <sup>13</sup>C spectrum of **6** in  $\text{CDCl}_3$ .

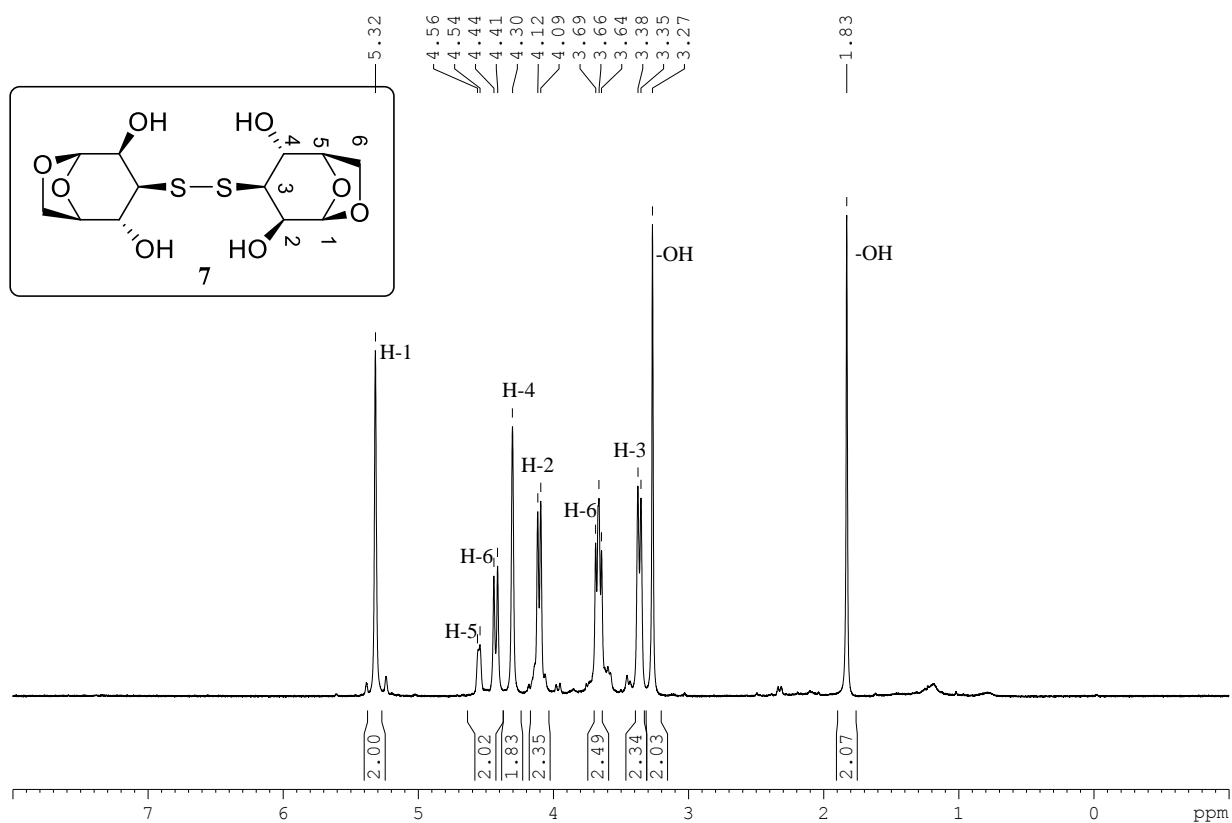

Figure S-9: <sup>1</sup>H spectrum of 7 in D<sub>2</sub>O.

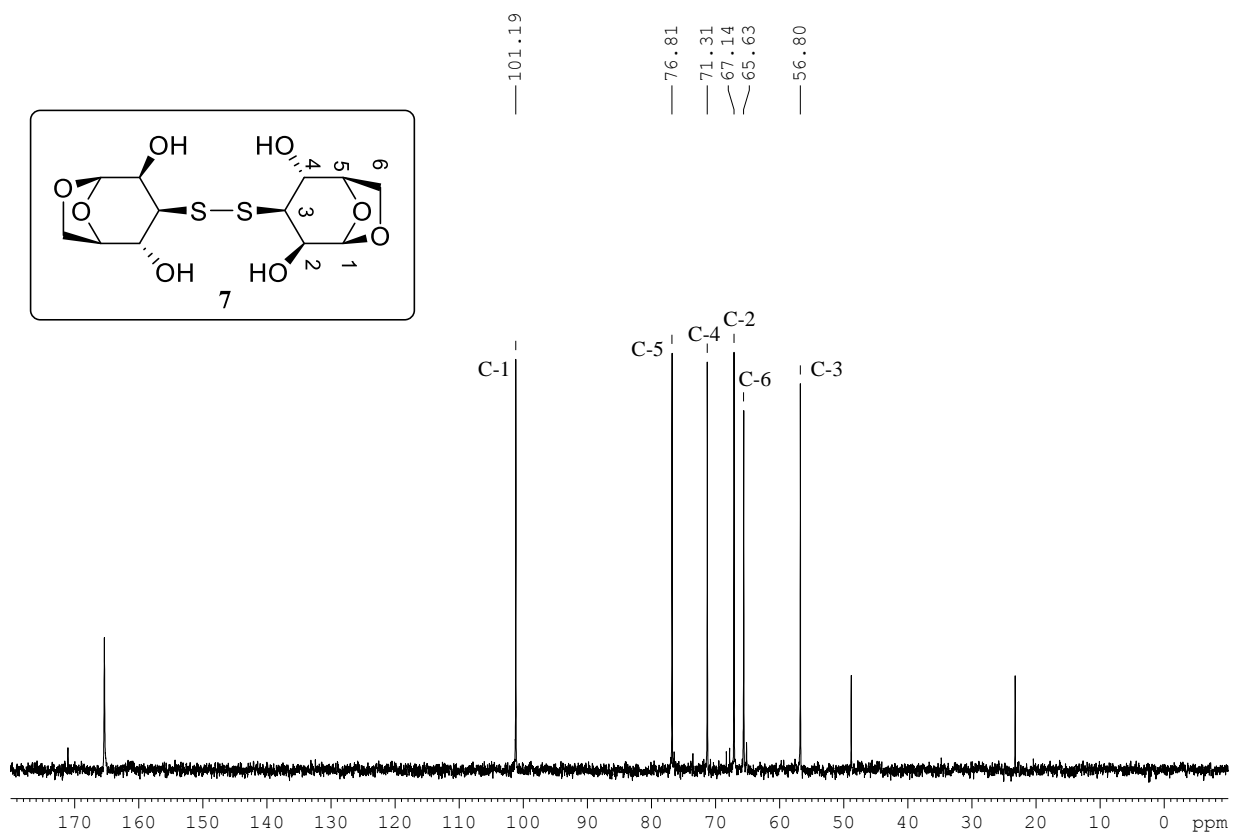

Figure S-10: <sup>13</sup>C spectrum of 7 in D<sub>2</sub>O.

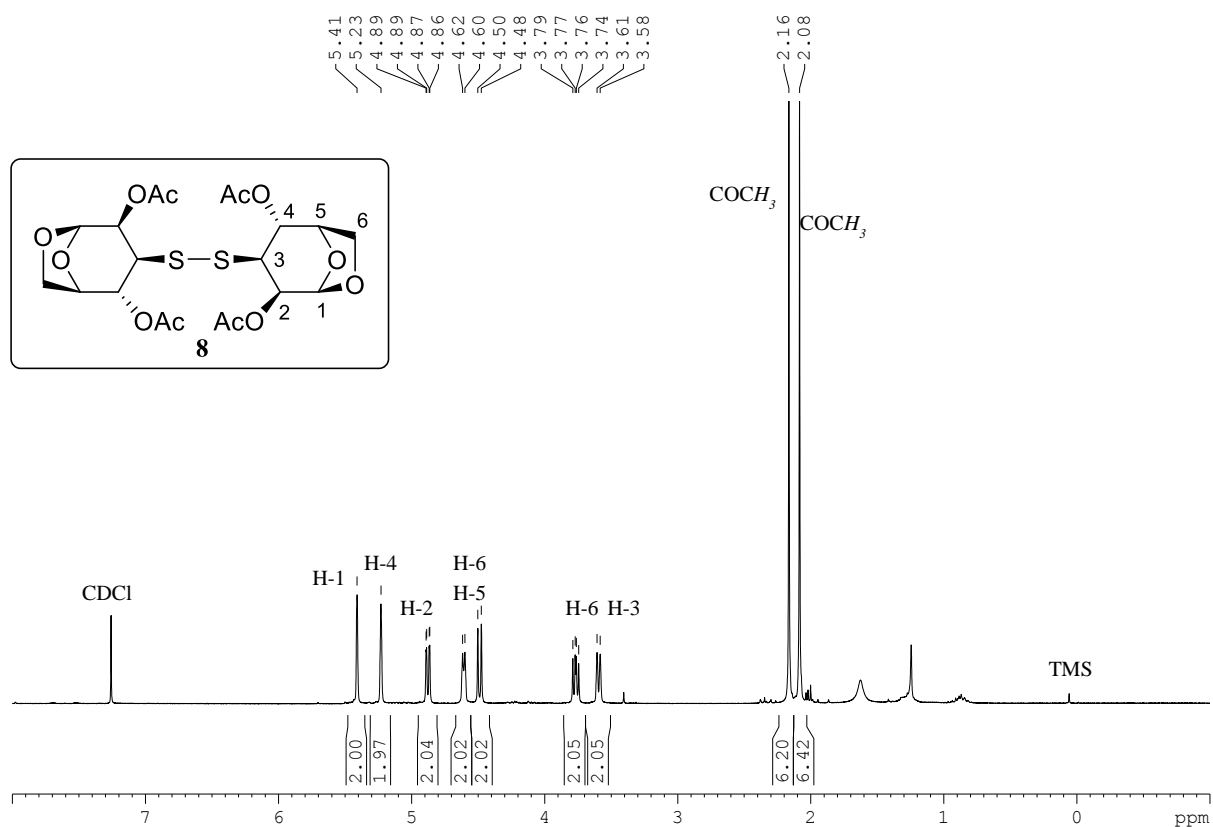

Figure S-11:  $^1\text{H}$  spectrum of **8** in CDCl<sub>3</sub>.

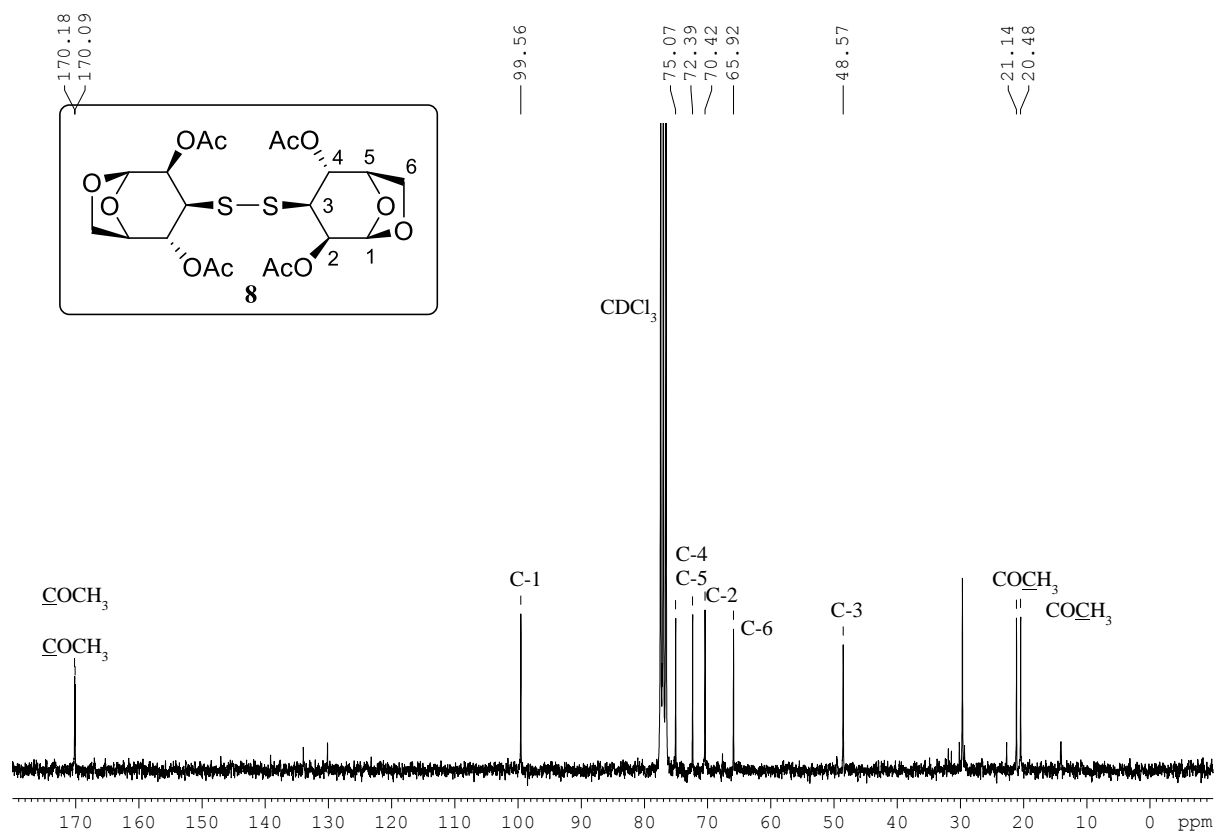

Figure S-12:  $^{13}\text{C}$  spectrum of **8** in CDCl<sub>3</sub>.

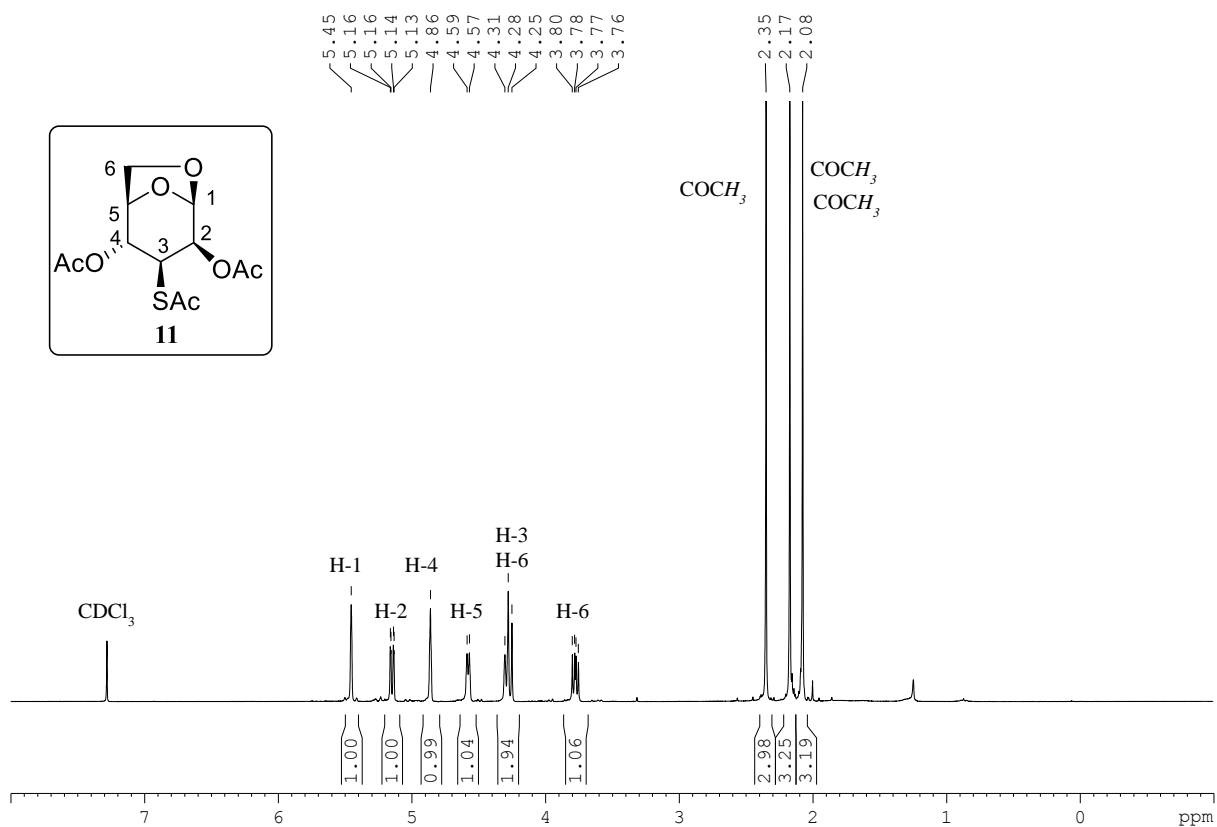

Figure S-13: <sup>1</sup>H spectrum of **11** in CDCl<sub>3</sub>.

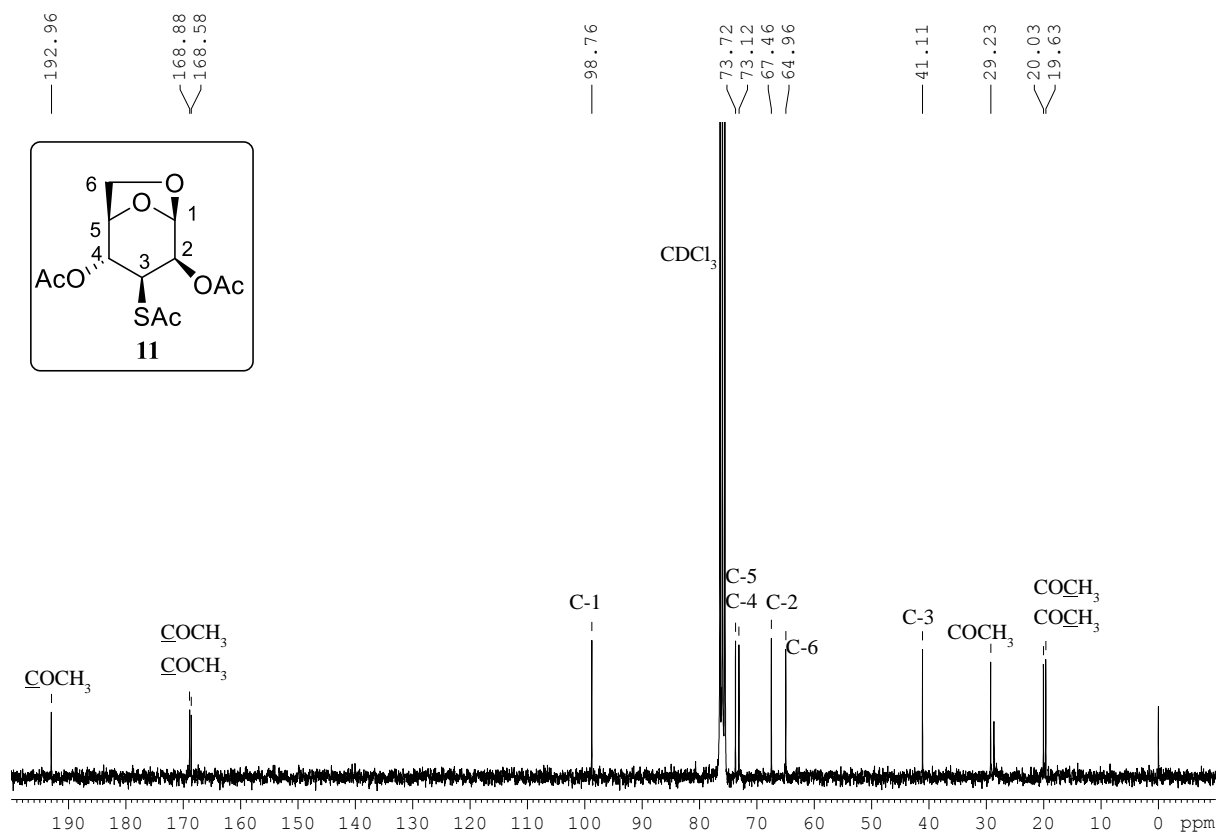

Figure S-14: <sup>13</sup>C spectrum of **11** in CDCl<sub>3</sub>.

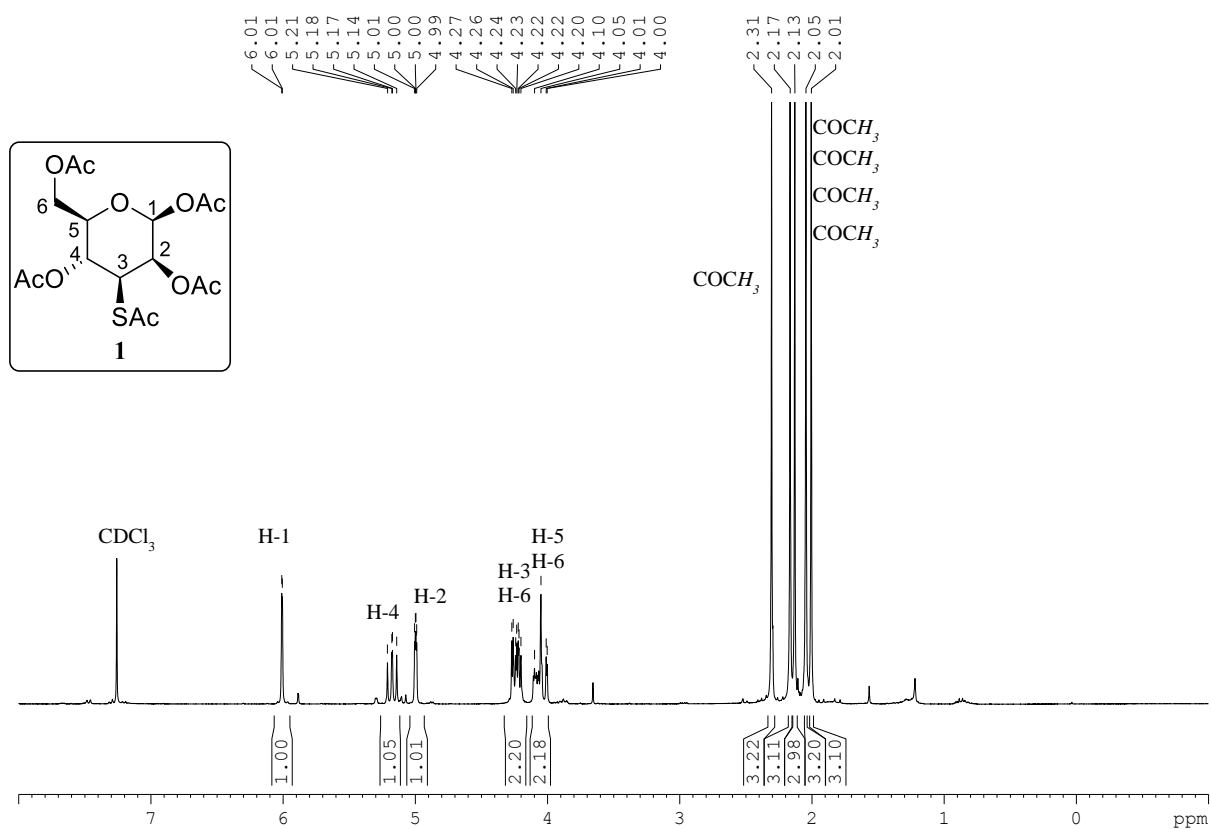

Figure S-15: <sup>1</sup>H spectrum of **1** in CDCl<sub>3</sub>.

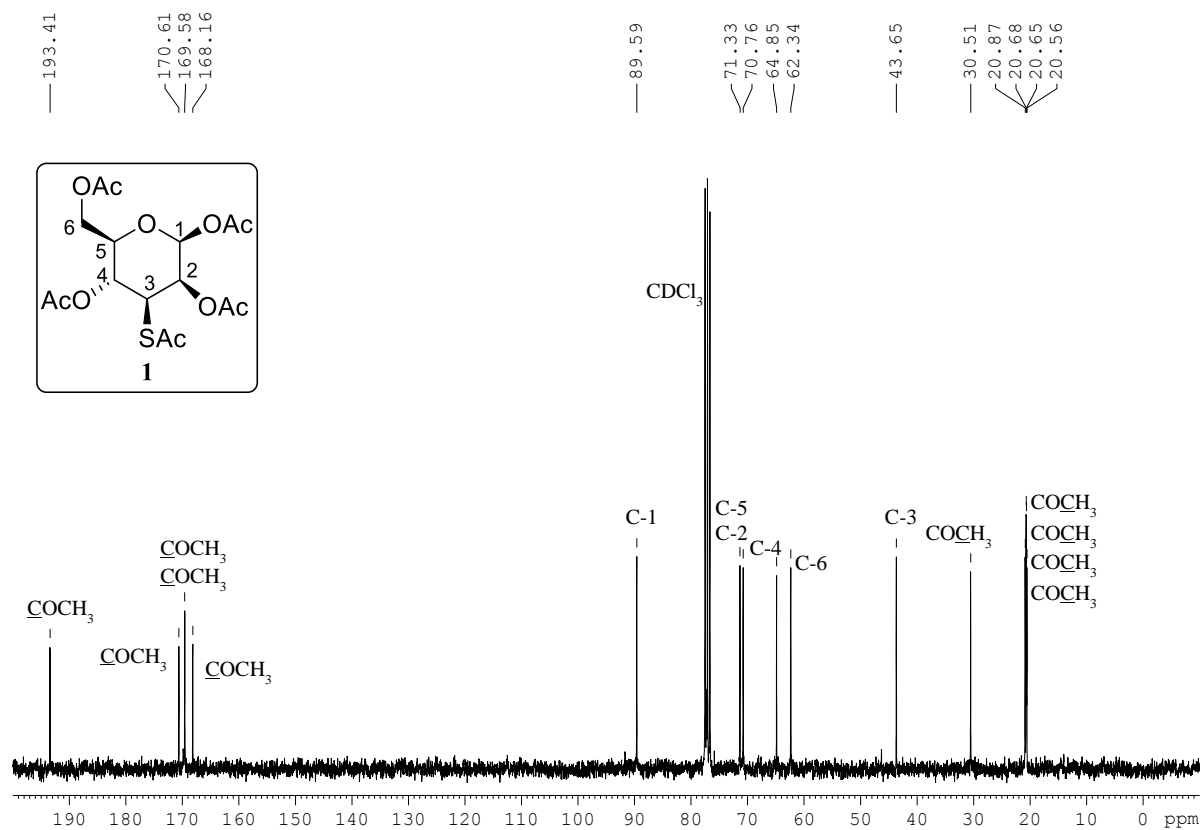

Figure S-16: <sup>13</sup>C spectrum of **1** in CDCl<sub>3</sub>.
